# Supplementary material for: Direct hydrothermal synthesis of amine-functionalized cubic hematite (C-Fe2O3) and sonochemical deposition of nanosized Au for its application as a visible-light photocatalyst
Source: Royal Society of Chemistry journal article supplement (doi:10.1039/c9dt04611a), 2020-01-01
Supplement: c9dt04611a1.pdf [file c9dt04611a1.pdf]

## Supporting Information

for

### **Hydrothermal direct synthesis of amine-functionalized cubic hematite (C-Fe<sub>2</sub>O<sub>3</sub>) and sonochemical deposition of nanosized Au for its application to a visible-light photocatalyst**

Won-Sik Jung<sup>1</sup>, Soo-Hyeon Park<sup>1</sup>, Abhijit Nanaso Kadam<sup>1</sup>, Hansang Kim<sup>2,\*</sup>, Sang-Wha Lee<sup>1,\*</sup>

<sup>1</sup>Department of Chemical and Biological Engineering, Gachon University, 1342 Seongnamdaero,  
Seongnam-si 13120, Republic of Korea

<sup>2</sup>Department of Mechanical Engineering, Gachon University, Seongnamdaero 1342,  
Seongnam-si, Korea

\*E-mail: [hskim70@gachon.ac.kr](mailto:hskim70@gachon.ac.kr), [lswha@gachon.ac.kr](mailto:lswha@gachon.ac.kr)

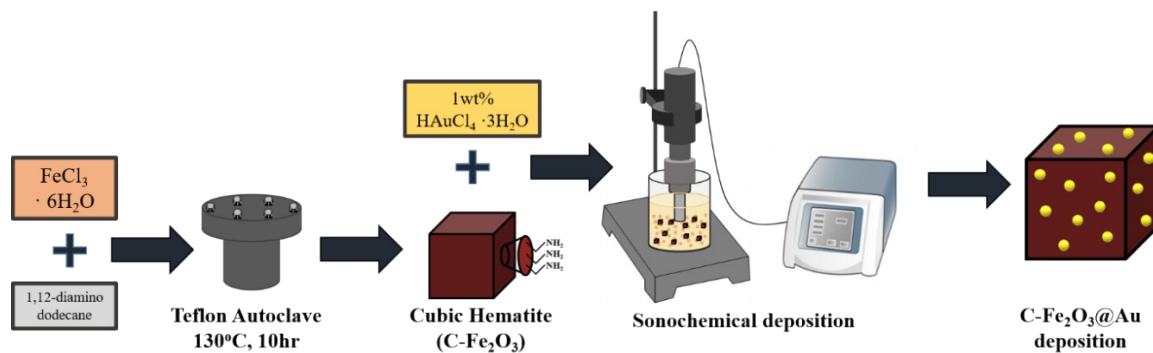

**Fig. S1.** Synthetic procedures of Au-deposited C-Fe<sub>2</sub>O<sub>3</sub> (C-Fe<sub>2</sub>O<sub>3</sub>@Au) through the consecutive hydrothermal and ultrasonic deposition methods.

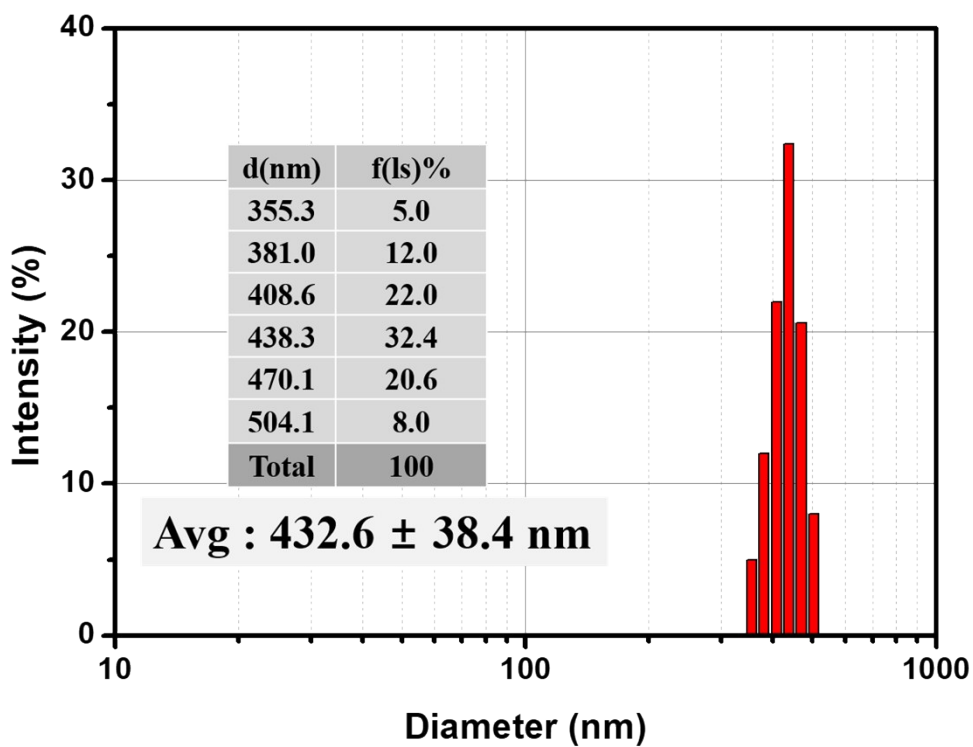

**Fig. S2.** Particle size distribution of C-Fe<sub>2</sub>O<sub>3</sub> by dynamic light scattering (DLS) method.

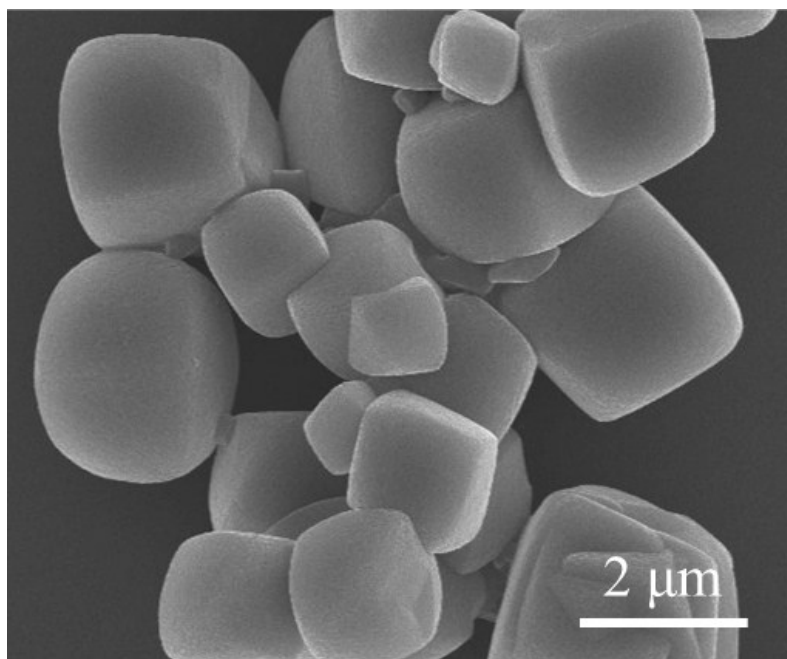

**Fig. S3.** SEM image of bare  $\text{Fe}_2\text{O}_3$  prepared without D-12 diamine.

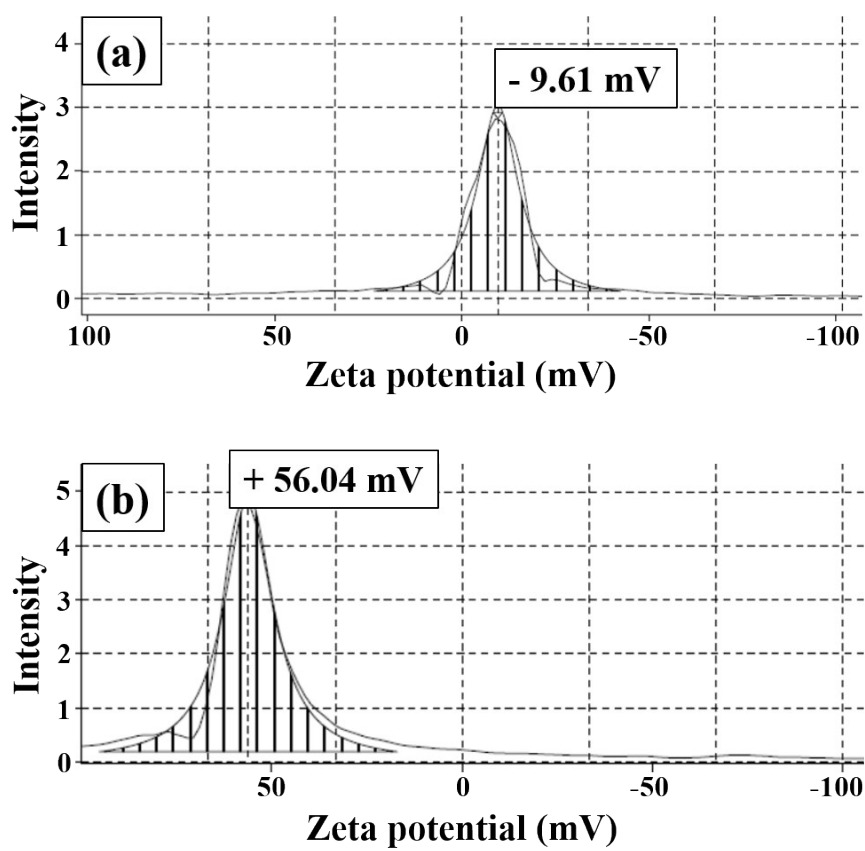

**Fig. S4.** Zeta-potential values of (a) bare  $\text{Fe}_2\text{O}_3$ , (b)  $\text{C-Fe}_2\text{O}_3$ .

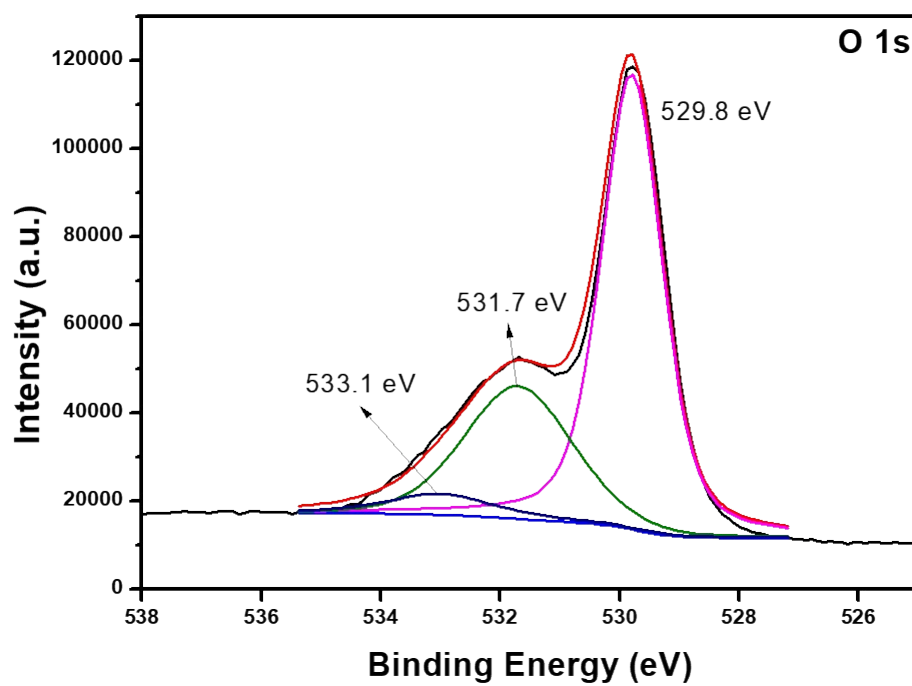

**Fig. S5.** X-Ray photoelectron spectroscopy (XPS) spectra of O 1s in C-Fe<sub>2</sub>O<sub>3</sub>@Au.

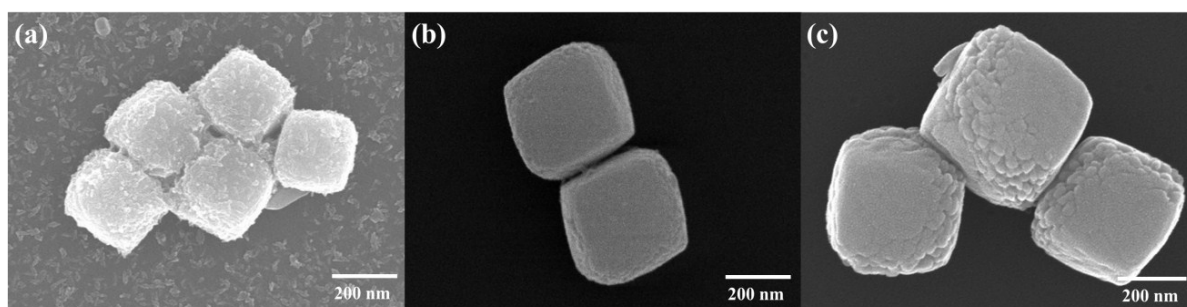

**Fig. S6.** SEM images of C-Fe<sub>2</sub>O<sub>3</sub> prepared at different reaction times: (a) 5 h, (b) 10 h, (c) 15 h.

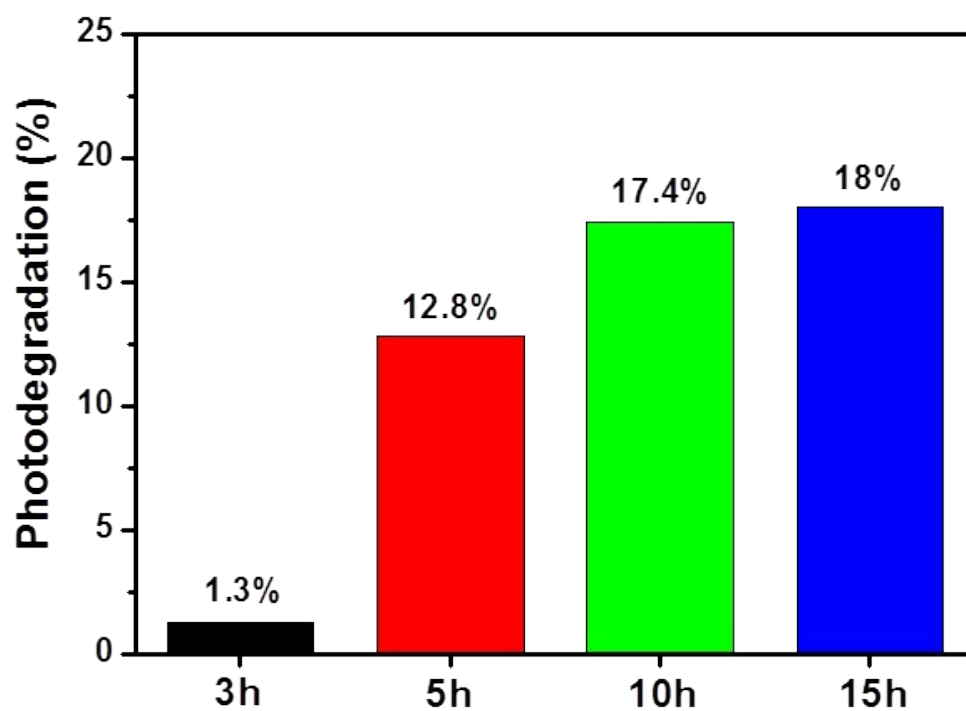

**Fig. S7.** Photodegradation efficiency of methylene blue (MB) over the  $\text{Fe}_2\text{O}_3$  particles prepared at different reaction times (3, 5, 10, and 15 h).

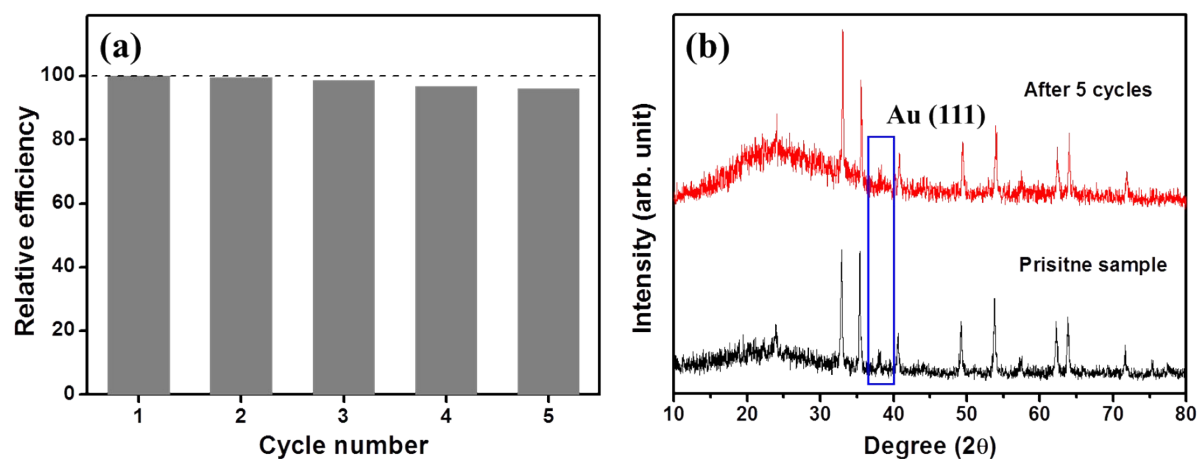

**Fig. S8.** (a) Reusability of  $\text{C-Fe}_2\text{O}_3@\text{Au}$  (0.1 ml) in the photocatalytic degradation of MB, (b) XRD patterns of  $\text{C-Fe}_2\text{O}_3@\text{Au}$  (0.1 ml) before and after the photocatalytic reaction.

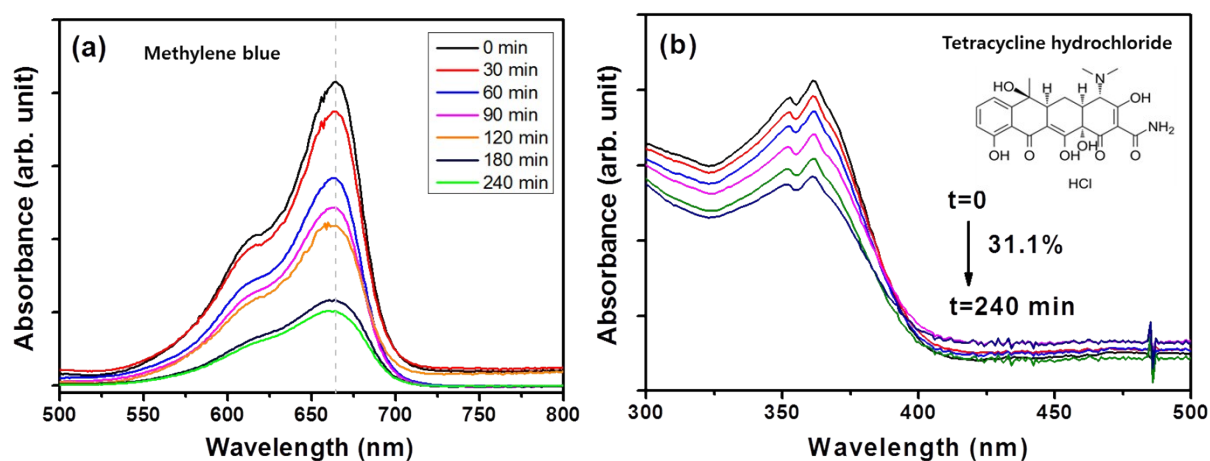

**Fig. S9.** Absorbance changes of organic pollutants over C-Fe<sub>2</sub>O<sub>3</sub>@Au (0.1 ml) during the photodegradation process: a) Methylene blue (10 ppm), b) Tetracycline hydrochloride (5 ppm).

**Table S1.** The rate constant of  $k_{app}$  obtained by the first-order rate law and the corresponding  $R^2$  values.

| As-prepared samples                               | $k_{app}$             | $R^2$  |
|---------------------------------------------------|-----------------------|--------|
| Blank                                             | $8.88 \times 10^{-5}$ | 0.9881 |
| Bare Fe <sub>2</sub> O <sub>3</sub>               | $2.43 \times 10^{-4}$ | 0.9643 |
| Cubic Fe <sub>2</sub> O <sub>3</sub>              | $7.69 \times 10^{-4}$ | 0.9507 |
| Cubic Fe <sub>2</sub> O <sub>3</sub> @Au (0.1 mL) | $6.58 \times 10^{-3}$ | 0.9707 |
| Cubic Fe <sub>2</sub> O <sub>3</sub> @Au (0.4 mL) | $5.43 \times 10^{-3}$ | 0.9911 |
| Cubic Fe <sub>2</sub> O <sub>3</sub> @Au (0.8 mL) | $2.63 \times 10^{-3}$ | 0.9433 |
